# Supplementary material for: Coinfection takes its toll: Sea lice override the protective effects of vaccination against a bacterial pathogen in Atlantic salmon
Source: PubMed Central journal article supplement (PMC5736581; doi:10.1038/s41598-017-18180-6), 2017-12-19
Supplement: 41598_2017_18180_MOESM1_ESM.pdf [file 41598_2017_18180_MOESM1_ESM.pdf]

## **Supplementary information for**

### **Coinfection takes its toll: Sea lice override the protective effects of vaccination against a bacterial pathogen in Atlantic salmon.**

Carolina Figueroa, Paulina Bustos, Débora Torrealba, Brian Dixon, Carlos Soto, Pablo Conejeros, José A. Gallardo

**Table S1.** Comparison of vaccines against infectious pathogen authorized to be used in Chilean salmon aquaculture between 2006 and 2017.

**Figure S1.** Frequency distribution of the abundance of parasites per infected fish across all tanks.

**Figure S2.** Box plot of louse infection intensities in each test tank.

**Figure S3.** Spearman correlation of number of sea lice against bacterial load.

## **Supplementary Methods**

**Table S1.**

| species         | Pathogen classification | Pathogen                                    | Number of vaccines |            |
|-----------------|-------------------------|---------------------------------------------|--------------------|------------|
|                 |                         |                                             | 2006               | 2017       |
| Atlantic salmon | Bacteria                | <i>Piscirickettsia salmonis</i>             | 3                  | 32         |
|                 |                         | <i>Vibrio ordalii</i>                       | 6                  | 21         |
|                 |                         | <i>Aeromonas salmonicida</i> atypical       | 1                  | 5          |
|                 |                         | <i>Aeromonas salmonicida</i>                | 3                  | 4          |
|                 |                         | <i>Flavobacterium psychrophilum</i>         | -                  | 2          |
|                 |                         | <i>Vibrio anguillarum</i>                   | -                  | 1          |
|                 | Virus                   | Infectious pancreatic necrosis virus (IPNV) | 17                 | 36         |
|                 |                         | Infectious salmon anaemia virus (ISAV)      | -                  | 14         |
|                 | Parasite                | <i>Caligus rogercresseyi</i>                | -                  | 2          |
| Rainbow trout   | Bacteria                | <i>Piscirickettsia salmonis</i>             | 2                  | 18         |
|                 |                         | <i>Vibrio ordalii</i>                       | -                  | 7          |
|                 |                         | <i>Aeromonas salmonicida</i>                | -                  | 2          |
|                 |                         | <i>Flavobacterium psychrophilum</i>         | -                  | 1          |
|                 |                         | <i>Flavobacterium columnare</i>             | -                  | 1          |
|                 | Virus                   | IPNV                                        | 8                  | 20         |
| Pacific salmon  | Bacteria                | <i>Piscirickettsia salmonis</i>             | 3                  | 14         |
|                 | Virus                   | IPNV                                        | 6                  | 14         |
| Chinook salmon  | Bacteria                | <i>Piscirickettsia salmonis</i>             | 1                  | 7          |
|                 | Virus                   | IPNV                                        | 2                  | 7          |
|                 |                         | <b>TOTAL</b>                                | <b>52</b>          | <b>208</b> |

**Figure S1.**

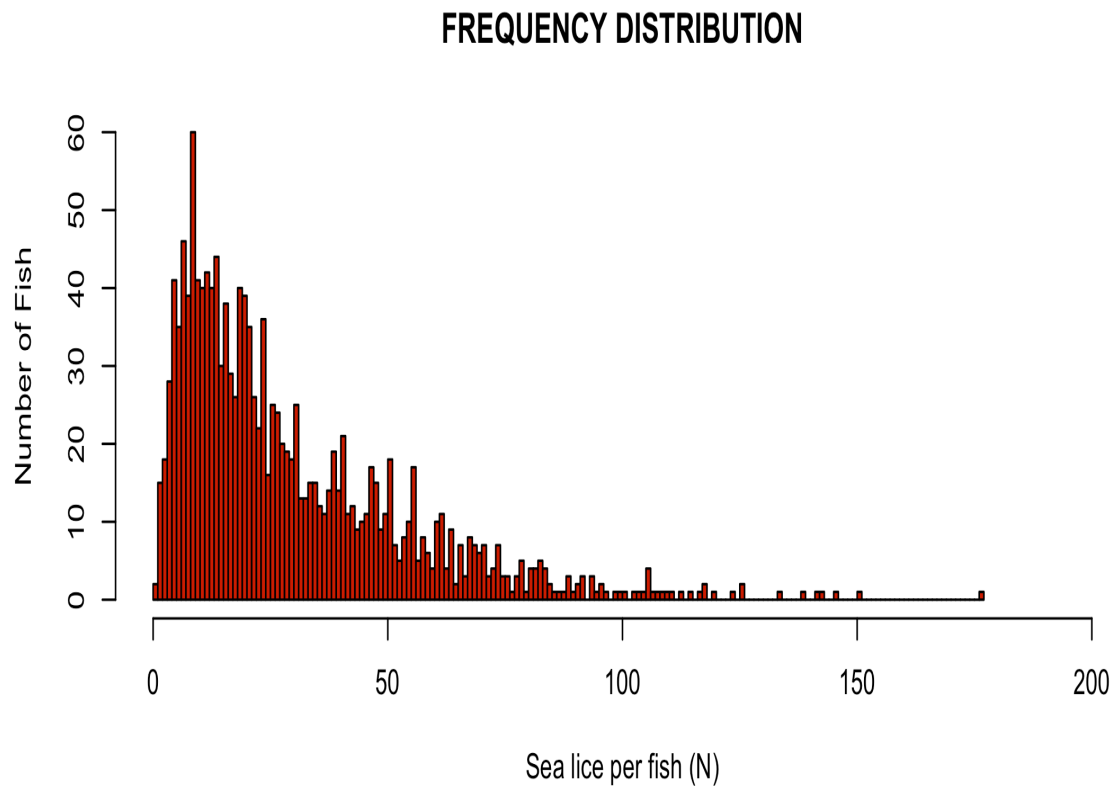

Figure S2.

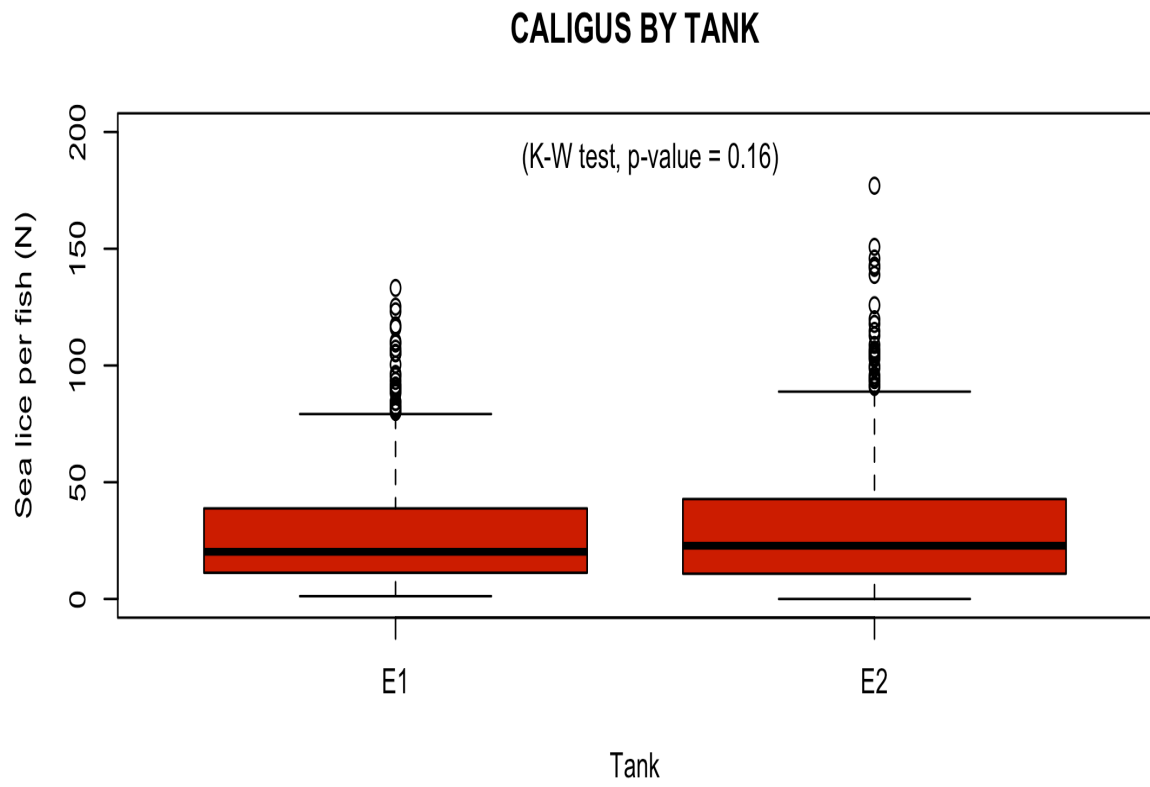

**Figure S3.**

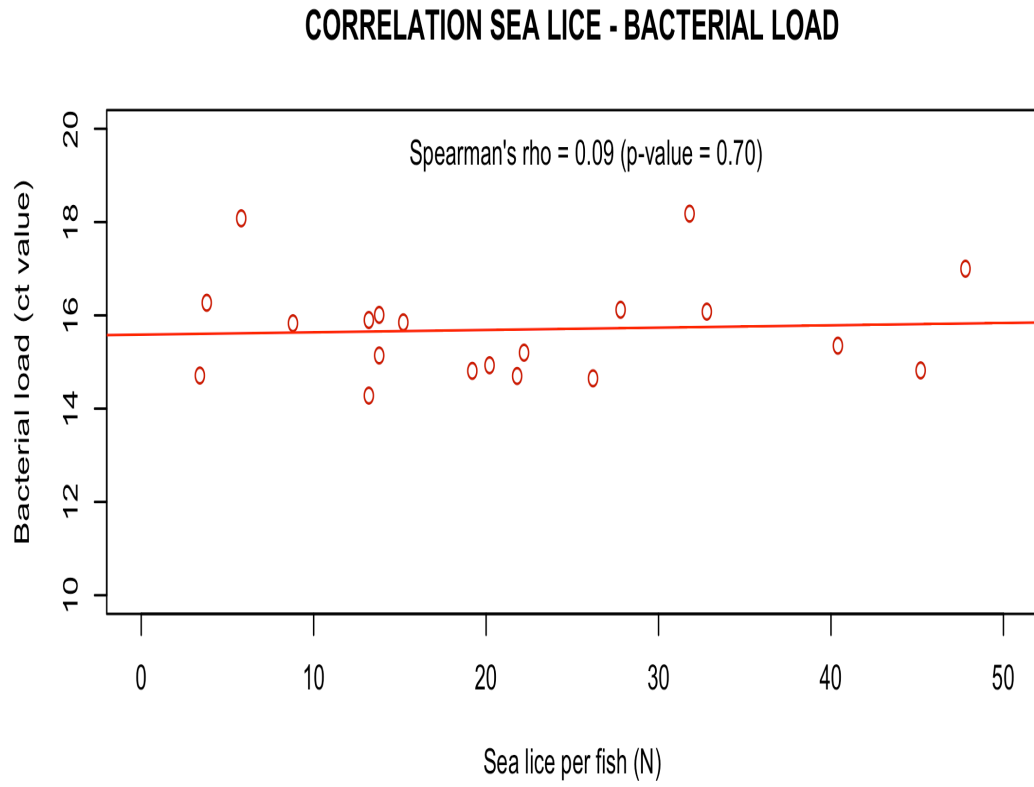

## **Supplementary Methods**

**Infection intensities between tanks and correlation analysis of parasites as a function of bacterial load.** To compare differences in louse infection intensities between tanks a non-parametric Kruskal-Wallis Rank Sum test was performed. Spearman correlation was computed between number of sea lice successfully settled on the fish as copepodites and bacterial load (Ct value) on a sample of 20 moribund fish sampled when 50% mortality was achieved in the coinfection treatment.
